# Supplementary material for: Microwave-assisted synthesis: from a mononuclear {CoII} complex to {CoII9} solvomorphs
Source: Royal Society of Chemistry journal article supplement (doi:10.1039/c8dt04557g), 2018-12-12
Supplement: c8dt04557g1.pdf [file c8dt04557g1.pdf]

## Supporting Information

Microwave-assisted synthesis: from a mononuclear  $\{\text{Co}^{\text{II}}\}$  complex to  $\{\text{Co}^{\text{II}}_9\}$  solvomorphs.

Alexandra Collet,<sup>a</sup> Claire Wilson<sup>a</sup> and Mark Murrie<sup>\*a</sup>

<sup>a</sup>*WestCHEM, School of Chemistry, University of Glasgow, University Avenue,  
Glasgow, G12 8QQ, UK. E-mail: mark.murrie@glasgow.ac.uk*

| Contents                                          | Page |
|---------------------------------------------------|------|
| 1. Experimental section and physical measurements | 2    |
| 2. Single-Crystal X-ray Diffraction               | 3    |
| 3. Dc and ac Magnetic Susceptibility              | 8    |
| 4. References                                     | 10   |

## **1. Experimental section and physical measurements**

### **Solvothermal conditions**

**Mixture** of complexes:  $[\text{Co}^{\text{II}}(\text{H}_2\text{bic})\text{Cl}]$  (**1**),  $[\text{Co}^{\text{II}}_9(\text{Hbic})_4(\text{bic})_2\text{Cl}_4]$  (**2**) and  $[\text{Co}^{\text{II}}_9(\text{Hbic})_4(\text{bic})_2\text{Cl}_4] \cdot 12\text{H}_2\text{O}$  (**2**·12H<sub>2</sub>O)

Into a solution of bicine (H<sub>3</sub>bic, *N,N*-Bis(2-hydroxyethyl)glycine) (0.5 mmol, 82 mg) in EtOH (2 ml) was added a solution of CoCl<sub>2</sub>·6H<sub>2</sub>O (1 mmol, 238 mg) in EtOH (5 ml) and the solution was stirred for 5 minutes at room temperature. Then, NEt<sub>3</sub> (0.13 mmol, 0.02 ml) was added and the solution stirred for another 15 minutes. The dark blue solution was placed in a Teflon lined autoclave and heated to 140 °C, at a rate of 5 °C/min. The temperature was held at 140 °C for 3 days and then the solution was allowed to cool to room temperature at a rate of 0.1 °C/min yielding three kinds of crystals: pink and blue block-like crystals and blue needle-like crystals.

Single-crystal X-ray diffraction revealed that the unit cell of the pink block-like crystals corresponds to the previously reported  $[\text{Co}^{\text{II}}(\text{H}_2\text{bic})\text{Cl}]$  (**1**)<sup>1</sup> and the blue block-like crystals correspond to complex  $[\text{Co}^{\text{II}}_9(\text{Hbic})_4(\text{bic})_2\text{Cl}_4]$  (**2**). Single-crystal X-ray diffraction for the blue needle-like crystals revealed a solvomorph of **2**, complex  $[\text{Co}^{\text{II}}_9(\text{Hbic})_4(\text{bic})_2\text{Cl}_4] \cdot 12\text{H}_2\text{O}$  (**2**·12H<sub>2</sub>O).

### **Microwave-mediated conditions**

**Microwave reactor model:** Discover LabMate (model no. 908010), Matthews. NC, made in USA by CEM Corporation.

#### **$[\text{Co}^{\text{II}}(\text{H}_2\text{bic})\text{Cl}]$ (**1**)**

A solution of CoCl<sub>2</sub>·6H<sub>2</sub>O (1 mmol, 238 mg), bicine (0.5 mmol, 82 mg) and NEt<sub>3</sub> (0.13 mmol, 0.02 ml) in EtOH (7 ml) was placed in a glass tube sealed with a cap (suitable glass tube and cap designed for microwave reaction), which was then inserted into the cavity of a microwave reactor. The reaction mixture was held at 140 °C, power: 150 W and pressure: 300 PSI for a total of 15 min. Then the solution was allowed to cool naturally to room temperature to give a dark blue solution with pink crystalline precipitate which was collected by filtration and dried in air before characterising with powder X-ray diffraction and elemental analysis (~18% yield). Elemental analysis calcd(%) for C<sub>6</sub>H<sub>12.5</sub>CoNO<sub>4.25</sub>Cl: C 27.61%, H 4.83%, N 5.37%, found: C 27.49%, H 4.69%, N 5.26%, which corresponds to  $[\text{Co}^{\text{II}}(\text{H}_2\text{bic})\text{Cl}] \cdot 0.25\text{H}_2\text{O}$  (**1**·0.25H<sub>2</sub>O).

#### **$[\text{Co}^{\text{II}}_9(\text{Hbic})_4(\text{bic})_2\text{Cl}_4]$ (**2**)**

A solution of CoCl<sub>2</sub>·6H<sub>2</sub>O (1 mmol, 238 mg), bicine (0.5 mmol, 82 mg) and NEt<sub>3</sub> (0.5 mmol, 0.075 ml) in EtOH (7 ml) was placed in a sealed glass tube, which was then inserted into the cavity of a microwave reactor. The reaction mixture was held at 140 °C, power: 150 W and pressure: 300 PSI for a total of 15 min. Then the solution was allowed to cool naturally to room temperature to give a dark blue solution with blue crystalline precipitate which was collected by filtration and dried under a nitrogen atmosphere before characterising with powder X-ray diffraction and elemental analysis (~17% yield). Elemental analysis calcd(%) for C<sub>36</sub>H<sub>64</sub>Co<sub>9</sub>N<sub>6</sub>O<sub>24</sub>Cl<sub>4</sub>: C 26.41%, H 3.94%, N 5.13%, found: C 26.27%, H 4.12%, N 4.91%.

## **[Co<sup>II</sup><sub>9</sub>(Hbic)<sub>4</sub>(bic)<sub>2</sub>Cl<sub>4</sub>].12H<sub>2</sub>O (2·12H<sub>2</sub>O)**

A solution of CoCl<sub>2</sub>·6H<sub>2</sub>O (1 mmol, 238 mg), bicine (0.5 mmol, 82 mg) and NEt<sub>3</sub> (0.5 mmol, 0.075 ml) in EtOH (7 ml) was placed in a sealed glass tube, which was then inserted into the cavity of a microwave reactor. The reaction mixture was held at 140 °C, power: 150 W and pressure: 300 PSI for a total of 15 min. Then the solution was allowed to cool naturally to room temperature to give a dark blue solution with blue crystalline precipitate which was collected by filtration and dried in air before characterising with powder X-ray diffraction and elemental analysis (~17% yield). Elemental analysis calcd(%) for C<sub>36</sub>H<sub>86</sub>Co<sub>9</sub>N<sub>6</sub>O<sub>35</sub>Cl<sub>4</sub> : C 23.56%, H 4.72%, N 4.58%, found: C 24.06%, H 4.39%, N 4.52% which corresponds to [Co<sup>II</sup><sub>9</sub>(Hbic)<sub>4</sub>(bic)<sub>2</sub>Cl<sub>4</sub>].11H<sub>2</sub>O (one molecule of water is lost).

**Single-Crystal X-ray Diffraction:** Crystallographic data were collected at 100 K using Mo – K<sub>α</sub> radiation (λ = 0.710735 Å) using a Rigaku FRE+ equipped with VHF Varimax confocal mirrors and an AFC12 goniometer and HG Saturn 724+ detector.

**Powder X-Ray Diffraction (PXRD):** PXRD measurements were carried out at 298 K using a PANalytical X'Pert PRO diffractometer (λ (CuKα) = 1.4505 Å) on a mounted bracket sample stage over the range of 3° < 2θ < 40° (for complex **1**) and 3° < 2θ < 30° (for complexes **2** and 2·12H<sub>2</sub>O) using a step size of 0.0334°.

**Magnetic Susceptibility Measurements:** Variable-temperature direct current (dc) and alternating current (ac) magnetic susceptibility data were collected on a Quantum Design MPMS-XL SQUID magnetometer equipped with a 5 T magnet operating in the 290 - 2 K range. Polycrystalline samples were embedded in eicosane, to prevent torquing. Magnetic data have been corrected for diamagnetism (Pascal's constants and corrections for the sample holder).

**Microanalysis:** Elemental analyses (C, H, and N) were performed in-house in the School of Chemistry at the University of Glasgow.

## **2. Single-Crystal X-ray Diffraction**

Due to a region of poorly defined and disordered molecules of solvent in 2·12H<sub>2</sub>O, only two molecules of water were able to be modelled. The programme SQUEEZE (in PLATON) <sup>2</sup> was used to identify the solvent voids and account for the electron density within them, calculated to contain 886 e<sup>-</sup> per unit cell, corresponding to approximately 98 e<sup>-</sup> per molecule. Approximately 10 molecules of water solvent correspond to ~98 e<sup>-</sup>, therefore in total there are 12 molecules of co-crystallised water per complex. This is also in agreement with the elemental analysis (see experimental procedure of [Co<sup>II</sup><sub>9</sub>(Hbic)<sub>4</sub>(bic)<sub>2</sub>Cl<sub>4</sub>].12H<sub>2</sub>O (2·12H<sub>2</sub>O).

Solvent Accessible Volume = 3665 Å<sup>3</sup>

Electrons Found in S.A.V. = 886

Data collection: CrysAlisPro 1.171.39.9g (Rigaku Oxford Diffraction, 2015); cell refinement: CrysAlisPro 1.171.39.9g (Rigaku Oxford Diffraction, 2015); data reduction: CrysAlisPro 1.171.39.9g (Rigaku Oxford Diffraction, 2015); program used to solve structure: ShelXT; <sup>3</sup> program used to refine structure: SHELXL; <sup>3</sup> molecular graphics: Olex2; <sup>4</sup> software used to prepare material for publication: Olex2. <sup>4</sup>

**Table S1.** Data collection and crystallographic parameters for complexes **2** and **2**·12H<sub>2</sub>O.

|                                                                                                                |                                                                                                                                          |                                                                                                                                          |
|----------------------------------------------------------------------------------------------------------------|------------------------------------------------------------------------------------------------------------------------------------------|------------------------------------------------------------------------------------------------------------------------------------------|
| <b>Chemical formula</b>                                                                                        | C <sub>36</sub> H <sub>64</sub> Cl <sub>4</sub> Co <sub>9</sub> N <sub>6</sub> O <sub>24</sub> ( <b>2</b> )                              | C <sub>36</sub> H <sub>88</sub> Cl <sub>4</sub> Co <sub>9</sub> N <sub>6</sub> O <sub>36</sub> ( <b>2</b> ·12H <sub>2</sub> O)           |
| <b><i>M<sub>r</sub></i></b>                                                                                    | 1637.10                                                                                                                                  | 1853.29                                                                                                                                  |
| <b>Crystal system, space group</b>                                                                             | Monoclinic, <i>P</i> 2 <sub>1</sub> / <i>n</i>                                                                                           | Trigonal, <i>R</i> –3                                                                                                                    |
| <b>Temperature (K)</b>                                                                                         | 100                                                                                                                                      | 100                                                                                                                                      |
| <b><i>a</i>, <i>b</i>, <i>c</i> (Å)</b>                                                                        | 14.7276 (4), 11.8295 (3),<br>15.6451 (5)                                                                                                 | 39.2116 (8), 39.2116 (8),<br>11.7240 (3)                                                                                                 |
| <b><i>α</i>, <i>β</i>, <i>γ</i> (°)</b>                                                                        | 90, 94.809, 90                                                                                                                           | 90, 90, 120                                                                                                                              |
| <b><i>V</i> (Å<sup>3</sup>)</b>                                                                                | 2716.10 (13)                                                                                                                             | 15611.2 (8)                                                                                                                              |
| <b><i>Z</i></b>                                                                                                | 2                                                                                                                                        | 9                                                                                                                                        |
| <b>Radiation type</b>                                                                                          | Mo Kα radiation, λ =<br>0.71073 Å                                                                                                        | Mo Kα radiation, λ =<br>0.71073 Å                                                                                                        |
| <b>μ (mm<sup>-1</sup>)</b>                                                                                     | 2.96                                                                                                                                     | 2.34                                                                                                                                     |
| <b>Crystal size (mm)</b>                                                                                       | 0.08 × 0.07 × 0.04                                                                                                                       | 0.26 × 0.03 × 0.03                                                                                                                       |
| <b>Diffractometer</b>                                                                                          | Rigaku FRE+ equipped with<br>VHF Varimax confocal<br>mirrors and an AFC12<br>goniometer and HG Saturn<br>724+ detector<br>diffractometer | Rigaku FRE+ equipped with<br>VHF Varimax confocal<br>mirrors and an AFC12<br>goniometer and HG Saturn<br>724+ detector<br>diffractometer |
| <b><i>T</i><sub>min</sub>, <i>T</i><sub>max</sub></b>                                                          | 0.874, 1.000                                                                                                                             | 0.555, 1.000                                                                                                                             |
| <b>No. of measured,<br/>independent and<br/>observed [<i>I</i> &gt; 2σ(<i>I</i>)] reflections</b>              | 34254, 6234, 5718                                                                                                                        | 38042, 7930, 6410                                                                                                                        |
| <b><i>R</i><sub>int</sub></b>                                                                                  | 0.028                                                                                                                                    | 0.061                                                                                                                                    |
| <b><i>R</i>[<i>F</i><sup>2</sup> &gt; 2σ(<i>F</i><sup>2</sup>)], <i>wR</i>(<i>F</i><sup>2</sup>), <i>S</i></b> | 0.023, 0.055, 1.03                                                                                                                       | 0.054, 0.139, 1.00                                                                                                                       |
| <b>No. of reflections</b>                                                                                      | 6234                                                                                                                                     | 7930                                                                                                                                     |
| <b>No. of parameters</b>                                                                                       | 364                                                                                                                                      | 368                                                                                                                                      |
| <b>No. of restraints</b>                                                                                       | 6                                                                                                                                        | 483                                                                                                                                      |
| <b>H-atom treatment</b>                                                                                        | H atoms treated by a<br>mixture of independent and<br>constrained refinement                                                             | H atoms treated by a<br>mixture of independent and<br>constrained refinement                                                             |
| <b>Δ&gt;max, Δ&gt;min (e Å<sup>-3</sup>)</b>                                                                   | 1.25, –0.66                                                                                                                              | 2.11, –1.63                                                                                                                              |

**Table S2.** The CShMs values calculated with the program SHAPE <sup>5</sup> for each geometry for the five-coordinate Co<sup>II</sup> in complex **1**.

| Geometry                   | Value       |
|----------------------------|-------------|
| Pentagon                   | 34.70       |
| Vacant octahedron          | 6.75        |
| <b>Trigonal bipyramid</b>  | <b>1.42</b> |
| Spherical square pyramid   | 5.53        |
| Johnson trigonal bipyramid | 2.63        |

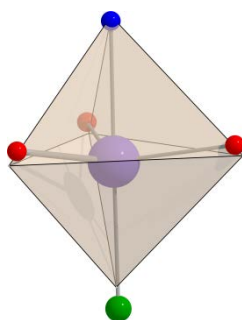

**Figure S1.** The closest reference polyhedron for TBP geometry calculated with SHAPE <sup>5</sup> for Co<sup>II</sup> of complex **1**. Colour code: Co<sup>II</sup>: violet, Cl: green, O: red, N: blue, bonds: grey.

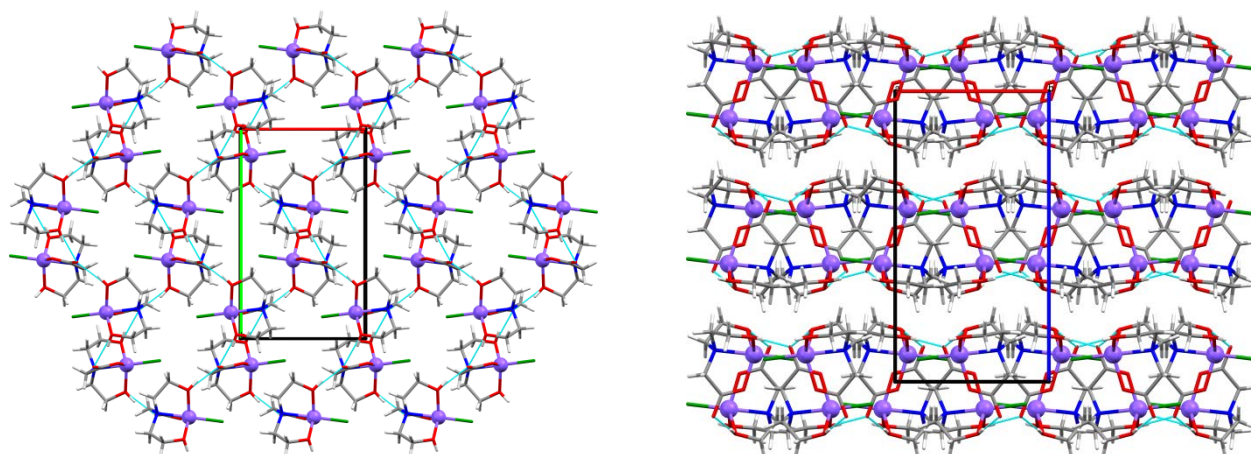

**Figure S2.** *Left:* The crystal packing of **1** along the *c* axis. *Right:* The crystal packing of **1** along the *b* axis. Colour code: Co<sup>II</sup>: violet, Cl: green, O: red, N: blue, C: grey, H: white. Light blue lines: illustration of the 2D network formed by the H-bonds.

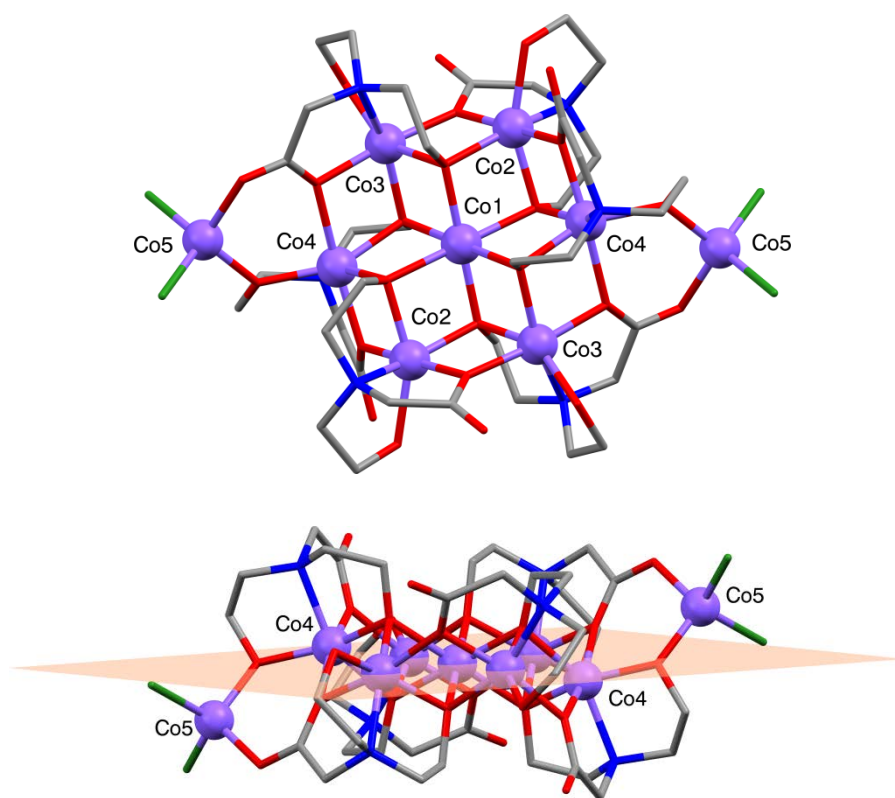

**Figure S3.** *Top:* The molecular structure of [Co<sup>II</sup><sub>9</sub>(Hbic)<sub>4</sub>(bic)<sub>2</sub>Cl<sub>4</sub>]. *Bottom:* The plane that five Co<sup>II</sup> (Co1, Co2, Co2', Co3, Co3') centres define, with Co4, Co4', Co5 and Co5' located outside this plane. Colour code: Co<sup>II</sup>: violet, Cl: green, O: red, N: blue, C: grey. Hydrogen atoms are omitted for clarity.

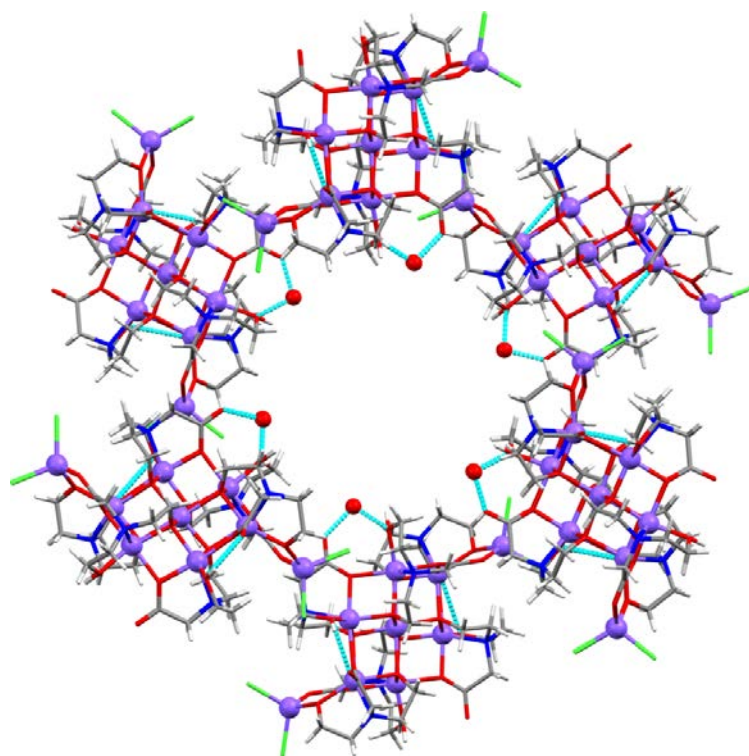

**Figure S4.** Illustration of the intramolecular and intermolecular interactions through the hydrogen bonds (light blue dashed lines) for complex **2**·12H<sub>2</sub>O. Only the modelled H<sub>2</sub>O sites are shown here, however further water molecules are present in the channels and were accounted for using SQUEEZE.<sup>6</sup>

**Table S3.** The CShMs values calculated with the program SHAPE<sup>7</sup> for each Co<sup>II</sup> centre in complex **2**.

| Co         | Octahedron | Trigonal prism | Tetrahedron |
|------------|------------|----------------|-------------|
| <b>Co1</b> | 1.3        | -              | -           |
| <b>Co2</b> | 3.3        | -              | -           |
| <b>Co3</b> | 4.5        | 5.3            | -           |
| <b>Co4</b> | 4.8        | 5.4            | -           |
| <b>Co5</b> | -          | -              | 0.8         |

**Table S4.** The CShMs values calculated with the program SHAPE <sup>7</sup> for each Co<sup>II</sup> centre in complex **2**·12H<sub>2</sub>O.

| Co  | Octahedron | Trigonal prism | Tetrahedron |
|-----|------------|----------------|-------------|
| Co1 | 1.3        | -              | -           |
| Co2 | 3.7        | -              | -           |
| Co3 | 3.8        | -              | -           |
| Co4 | 4.7        | 5.3            | -           |
| Co5 | -          | -              | 0.7         |

### 3. Dc and ac magnetic susceptibility

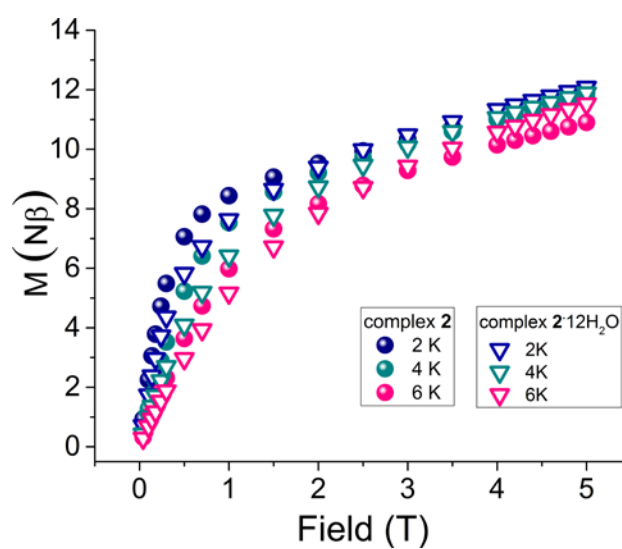

**Figure S5.** Magnetisation versus Field plot at temperatures 2, 4 and 6 K for complexes **2** (spheres) and **2**·12H<sub>2</sub>O (triangles).

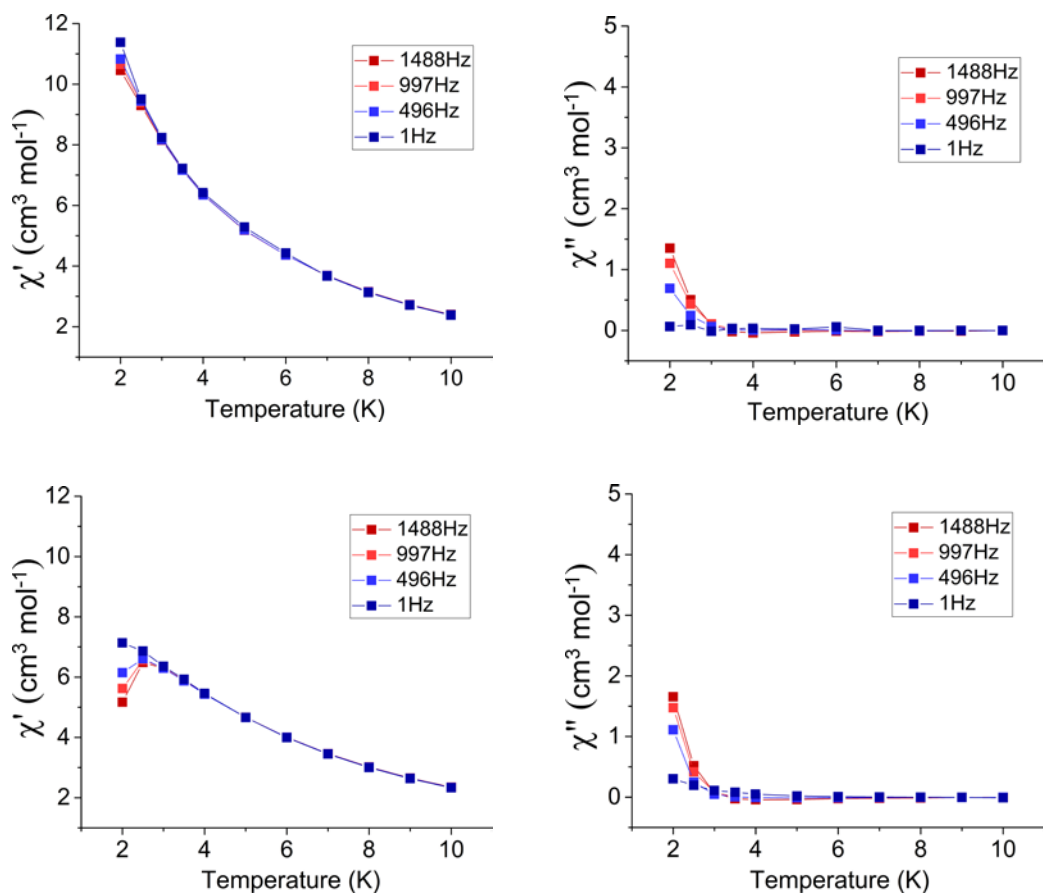

**Figure S6.** *Top:* Temperature dependence of the in-phase (*left*) and out-of-phase (*right*) susceptibility in zero dc field for complex **2** with ac frequencies of 1–1488 Hz. *Bottom:* Temperature dependence of the in-phase (*left*) and out-of-phase (*right*) susceptibility in a 2000 Oe dc field for complex **2** with ac frequencies of 1–1488 Hz. Note that the optimum additional dc field was not determined.

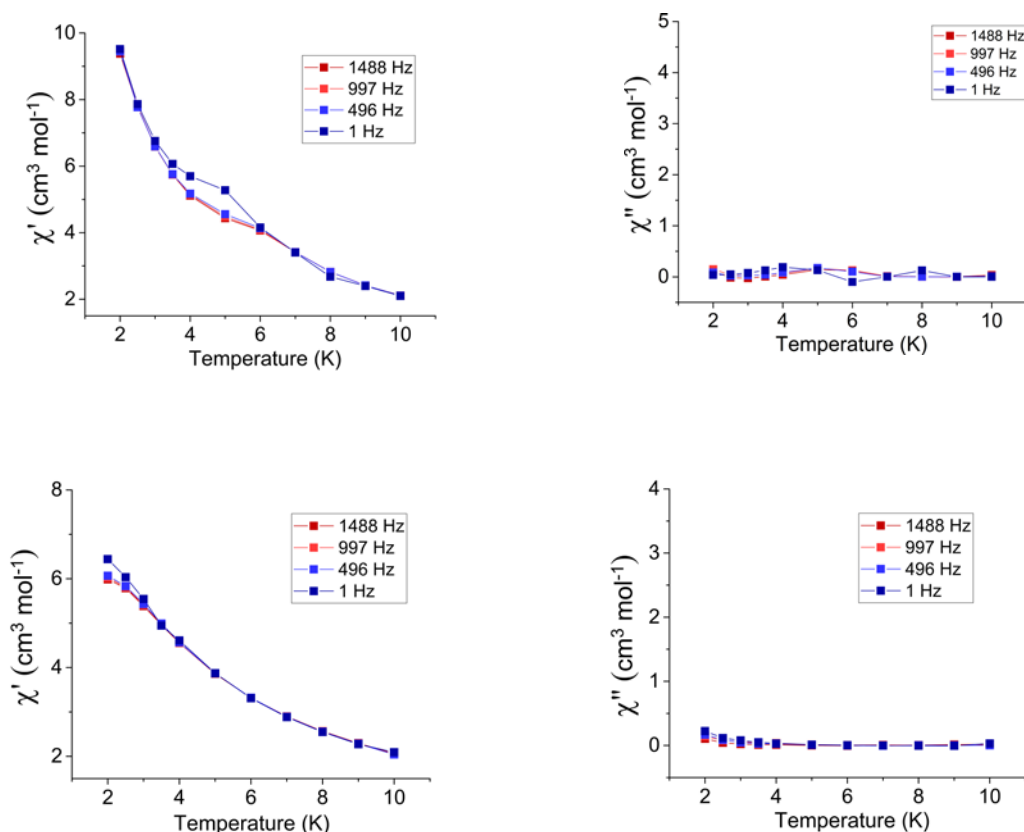

**Figure S7.** *Top:* Temperature dependence of the in-phase (left) and out-of-phase (right) susceptibility in zero dc field for complex **2**·12H<sub>2</sub>O with ac frequencies of 1–1488 Hz. *Bottom:* Temperature dependence of the in-phase (left) and out-of-phase (right) susceptibility in a 2000 Oe dc field for complex **2**·12H<sub>2</sub>O with ac frequencies of 1–1488 Hz.

#### 4. References

1. Y. Zhou, X. Liu, Q. Wang, L. Wang and B. Song, *Acta Crystallographica Section E*, 2016, **72**, 1463.
2. A. Spek, *Acta Crystallographica Section D*, 2009, **65**, 148.
3. G. M. Sheldrick, *Acta crystallographica. Section C, Structural chemistry*, 2015, **71**, 3.
4. O. V. Dolomanov, L. J. Bourhis, R. J. Gildea, J. A. K. Howard and H. Puschmann, *J. Appl. Crystallogr.*, 2009, **42**, 339.
5. M. Pinsky and D. Avnir, *Inorg. Chem.*, 1998, **37**, 5575; S. Alvarez and M. Lluell, *J. Chem. Soc., Dalton Trans.*, 2000, 3288.
6. A. Spek, *Acta Crystallographica Section C*, 2015, **71**, 9.
7. S. Alvarez, D. Avnir, M. Lluell and M. Pinsky, *New J. Chem.*, 2002, **26**, 996; C. Jordi, A. Pere and A. Santiago, *Chemistry – A European Journal*, 2004, **10**, 190.
